# Supplementary material for: Modulation of Protein Quality Control and Proteasome to Autophagy Switch in Immortalized Myoblasts from Duchenne Muscular Dystrophy Patients
Source: MDPI journal article supplement (doi:10.3390/ijms19010178), 2018-01-07
Supplement: s1 [file s1]

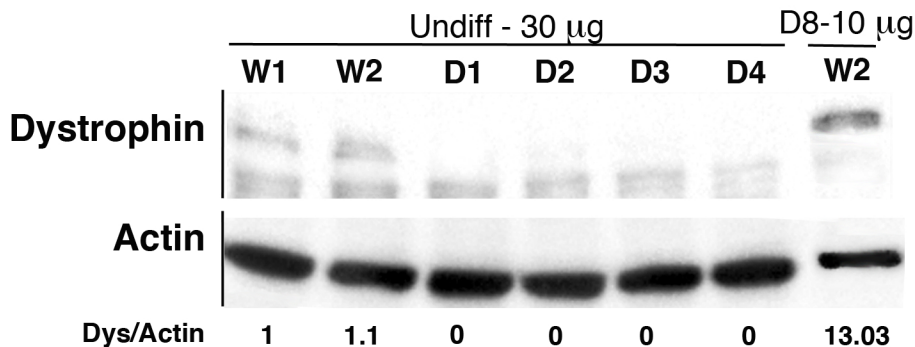

**Figure S1: Characterization of dystrophin expression in human immortalized myoblasts.** 30  $\mu$ g of total protein extracts from undifferentiated Wild Type (W1 & W2) and DMD (D1 to D4) cell line were separated by SDS-PAGE. Analysis of Dystrophin expression was performed by immunoblotting thanks to the use of Mandra1 antibody. Actin is used as a loading control. As a positive control, 10  $\mu$ g of total protein extracts of 8 days differentiated W2 cell line (D8, W2) were submitted to the same protocol (n=2).

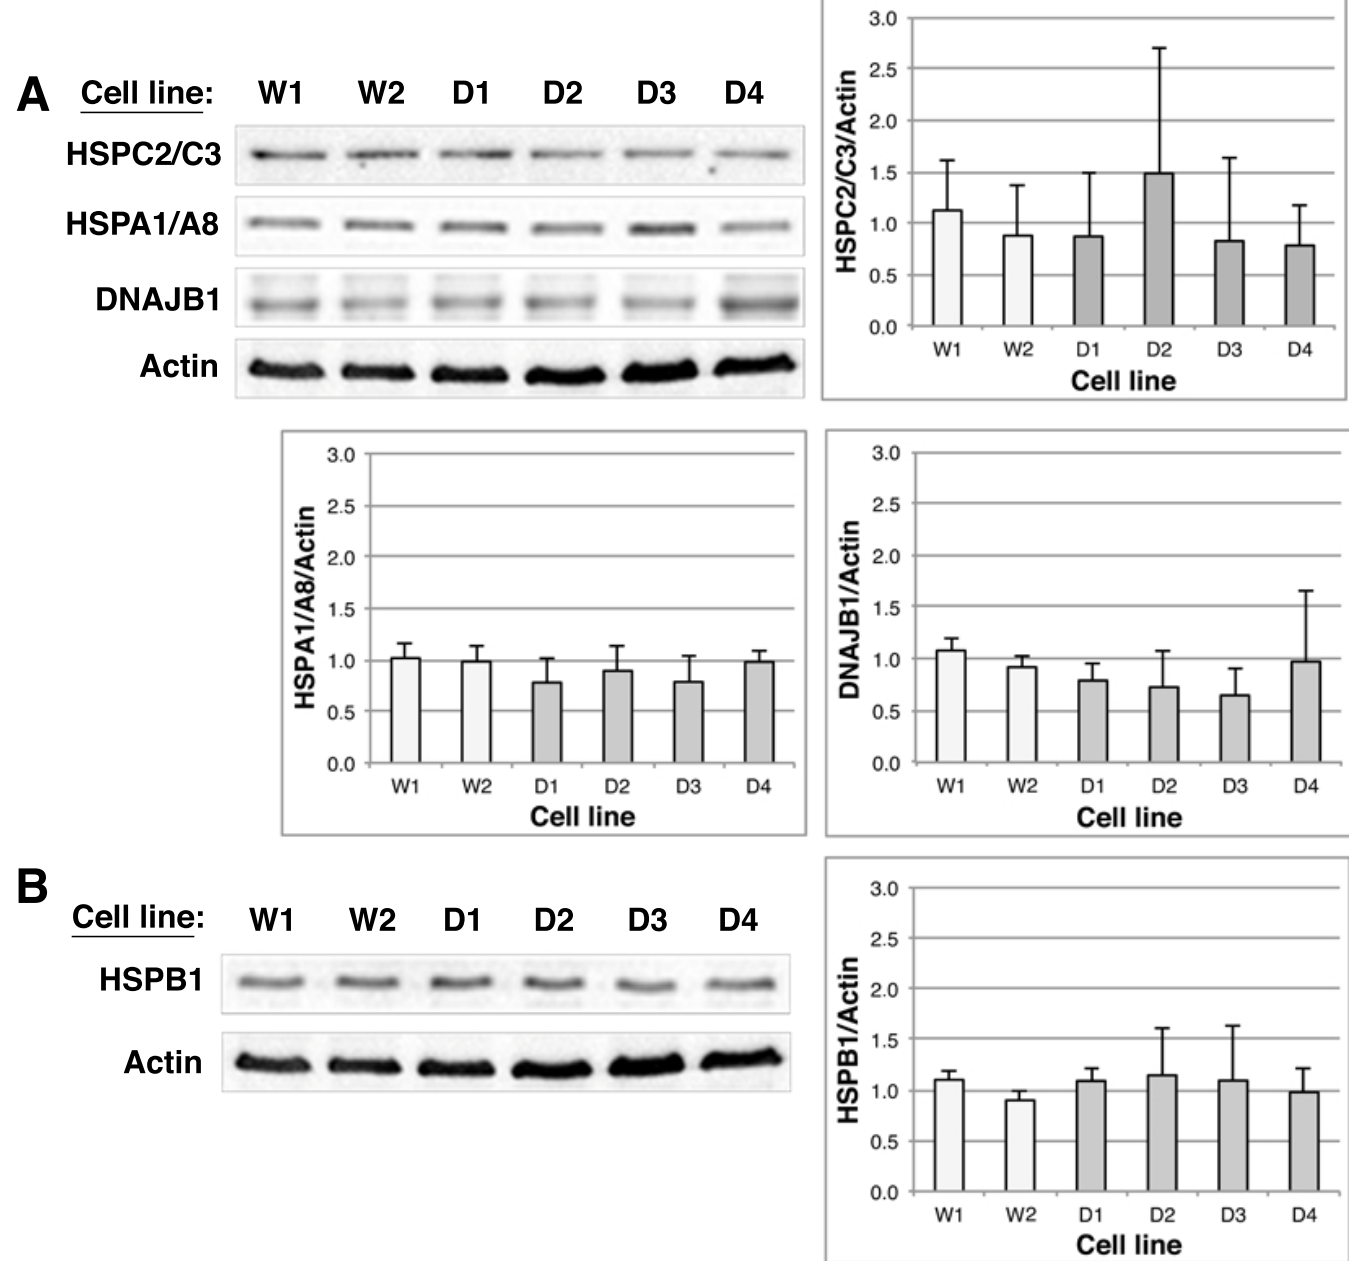

**Figure S2: Foldases and HSPB1 holdase expression are not modulated in human immortalized DMD myoblasts.** (A and B) 10  $\mu$ g of total protein extracts from Wild Type (W1 & W2) and DMD (D1 to D4) cell lines were separated by SDS-PAGE. Heat Shock proteins expression was analyzed by immunoblotting using (A) anti-HSPC2/C3, -HSPA1/A8, -DNAJB1 and -Actin antibodies; (B) anti-HspB1 and -Actin. Histograms indicate HSPC2/C3/Actin, HSPA1/A8/Actin, DNAJB1/Actin and HSPB1/Actin ratios. No statistically significant differences were observed between control and DMD cell lines (ANOVA,  $n=3$ )



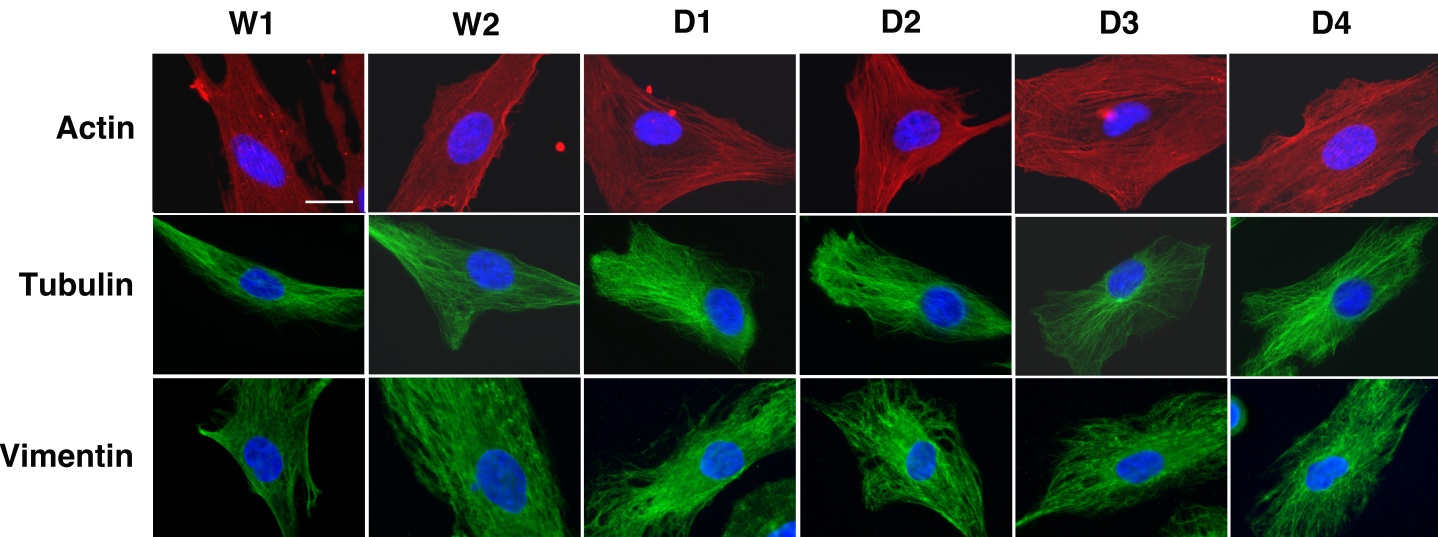

**Figure S3: Cytoskeleton filaments are not altered in DMD myoblasts.** Wild Type (W1 & W2) and DMD (D1 to D4) cell lines were fixed, permeabilized and stained with antibodies against, actin (red),  $\alpha$ -tubulin (green) or vimentin (green). Nuclei were stained with Hoechst (blue). Cells were analyzed with a fluorescence microscope (scale bar: 50  $\mu$ m) (n=3).

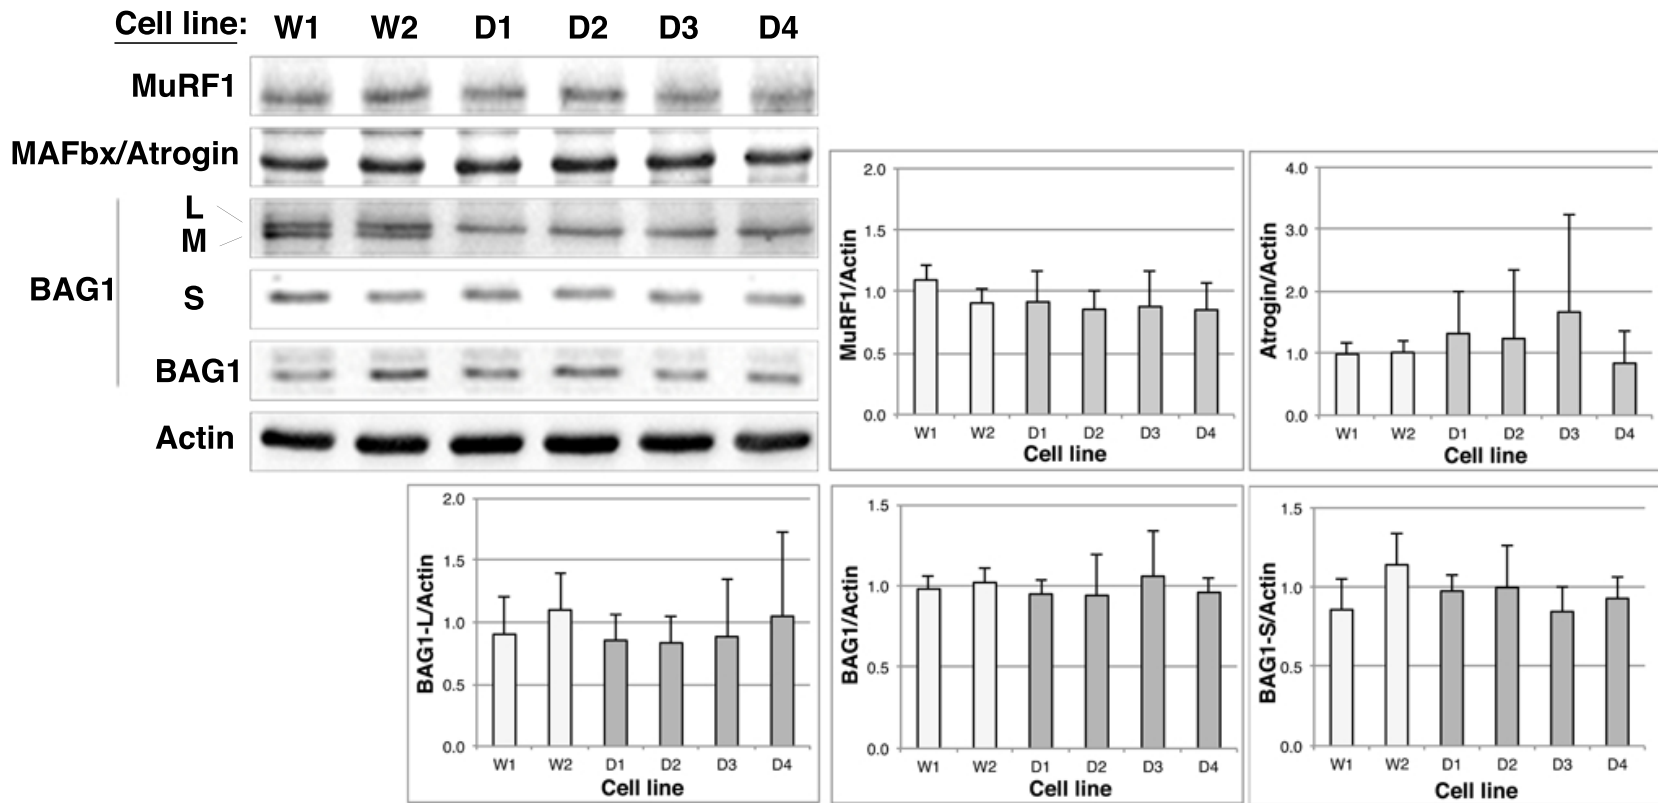

**Figure S4: E3 Ub ligases, BAG1, BAG1-L and BAG1 expression is not modulated in DMD myoblasts.** 10  $\mu$ g of total protein extracts of Wild Type and DMD cell lines were separated by SDS-PAGE. Analysis of the expression of the E3 Ub ligases MuRF1 and MAFbx/Atrogin and of BAG1 isoforms expression was performed using specific antibodies. Actin is revealed as a loading control. Histograms show the ratios of the various proteins *vs* Actin. No statistically significant differences could be observed (ANOVA test,  $n=3$ ).

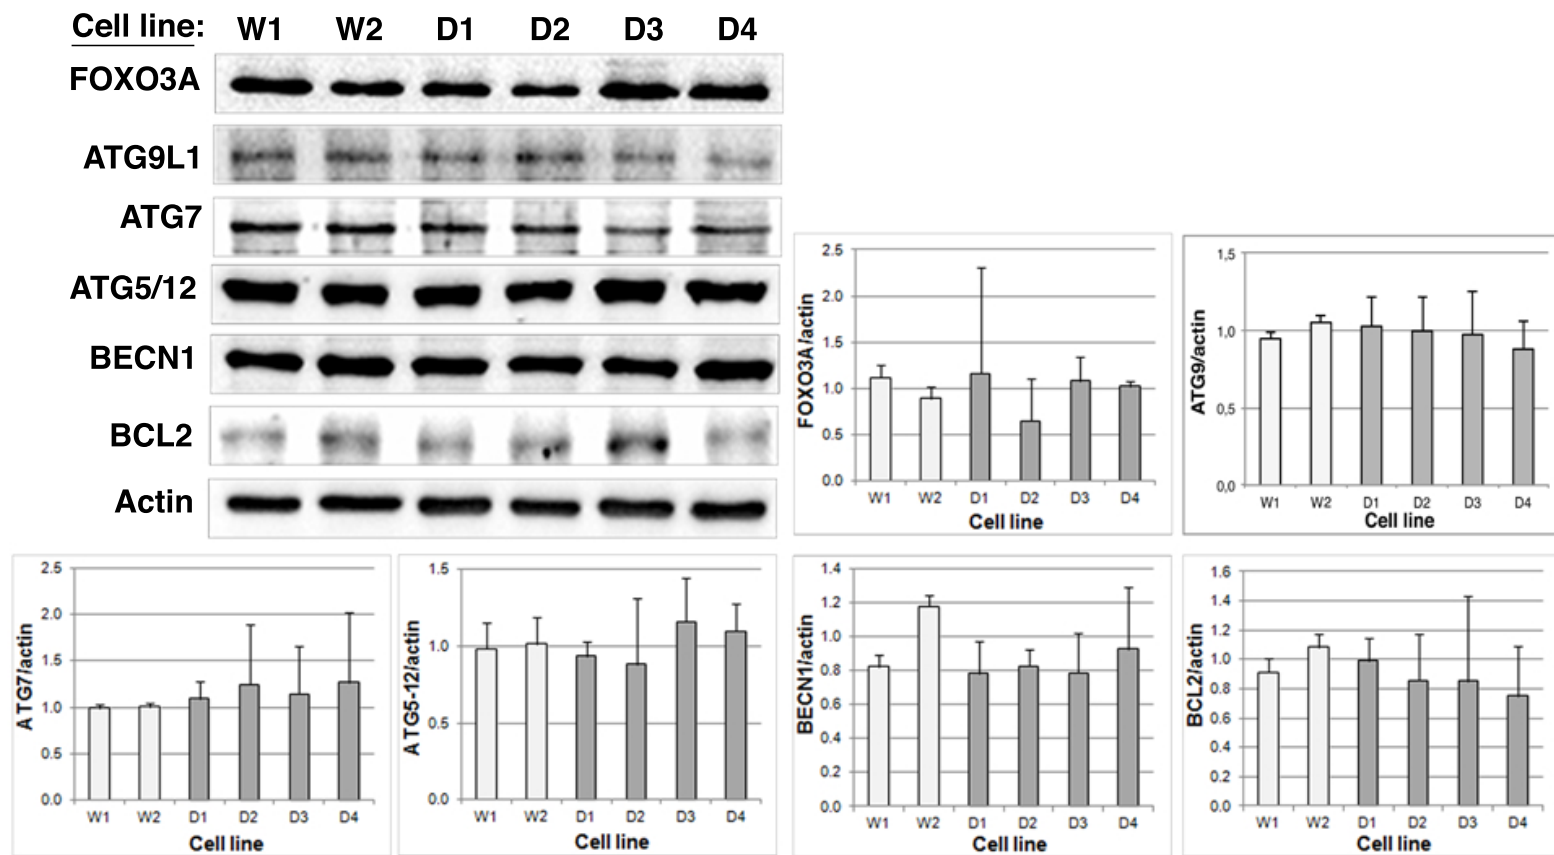

**Figure S5: FOXO3A, ATG9L, ATG7, ATG5/12, BECN1 and BCL2 levels are not modulated in DMD myoblasts.** 10  $\mu$ g of total protein extracts of Wild Type and DMD cell lines were separated by SDS-PAGE. Analysis of the expression of FOXO3a, ATG9L1, ATG7, ATG5/12 BECN1, BCL2 and Actin was performed using specific antibodies. Actin is revealed as a loading control. Histograms show the ratios of the various proteins *vs* Actin. No statistically significant differences could be observed (ANOVA test,  $n=3$ ).

| Densitometry FTA DMD<br>Densitometry FTA WT |    | Cell line |     |     |     |
|---------------------------------------------|----|-----------|-----|-----|-----|
|                                             |    | D1        | D2  | D3  | D4  |
| MultiUb                                     | W1 | 2.0       | 2.4 | 2.9 | 3.3 |
|                                             | W2 | 2.3       | 2.0 | 2.4 | 2.9 |
| p62                                         | W1 | 1.9       | 1.6 | 2.0 | 1.6 |
|                                             | W2 | 1.8       | 1.8 | 1.9 | 1.7 |
| HSPB5                                       | W1 | 3.8       | 3.6 | 3.6 | 5.2 |
|                                             | W2 | 3.9       | 3.9 | 3.8 | 3.8 |
| HSPB8                                       | W1 | 3.4       | 3.8 | 2.7 | 3.0 |
|                                             | W2 | 3.1       | 3.2 | 2.9 | 3.7 |
| BAG3                                        | W1 | 1.9       | 1.6 | 1.9 | 2.2 |
|                                             | W2 | 1.7       | 1.6 | 1.8 | 1.9 |

**Table S1:** Densitometric quantification of filter trap experiments.

2.5 µg of total protein extracts from WT and DMD cell lines were slot-blotted at four different dilutions (1, 1/2, 1/4 and 1/8) on a cellulose acetate membrane and probed with multi-ubiquitin, p62, HSPB5, HSPB8 or BAG3 antibodies. Densitometric analysis of the blots were performed and ratios between densitometric quantification of the 1/8 dilutions of DMD cell extracts and densitometric quantifications of the 1/8 dilutions of WT cell extracts were calculated and presented in the table. Standard deviation are less than 15%.
